# Supplementary material for: The microbiome associated with equine periodontitis and oral health
Source: Vet Res. 2016 Apr 14;47:49. doi: 10.1186/s13567-016-0333-1 (PMC4832512; doi:10.1186/s13567-016-0333-1)
Supplement: Supplementary file 1 — 10.1186/s13567-016-0333-1 OTUs that differed significantly between the groups. The output was created in LEfSe. [file 13567_2016_333_MOESM1_ESM.xlsx]

## Sheet: Sheet1
OTU_ID & taxon	log of the highest class average	class	LDA effect size	p value
OTU_777_D_0__Bacteria_D_1__Acidobacteria_D_2__Acidobacteria_D_3__Subgroup2	1.5618	Healthy	2.07039	0.0430952
OTU_241_D_0__Bacteria_D_1__Proteobacteria_D_2__Betaproteobacteria_D_3__Burkholderiales	1.81361	Healthy	2.0873	0.0283325
OTU_409_D_0__Bacteria_D_1__Proteobacteria_D_2__Alphaproteobacteria_D_3__Rhizobiales_D_4__Xanthobacteraceae	2.30216	Healthy	2.11591	0.0431209
OTU_326_D_0__Bacteria_D_1__Firmicutes_D_2__Bacilli_D_3__Lactobacillales_D_4__Streptococcaceae_D_5__Streptococcus	2.546	Healthy	2.13482	0.0181837
OTU_228_D_0__Bacteria_D_1__Firmicutes_D_2__Bacilli	2.3888	Healthy	2.14079	0.000416116
OTU_862_D_0__Bacteria_D_1__Verrucomicrobia_D_2__Spartobacteria_D_3__Chthoniobacterales	1.49485	Healthy	2.17454	0.0430694
OTU_209_D_0__Bacteria_D_1__Actinobacteria_D_2__Actinobacteria_D_3__Micrococcales_D_4__Microbacteriaceae	2.49845	Healthy	2.19015	0.0116567
OTU_368_D_0__Bacteria_D_1__Proteobacteria_D_2__Gammaproteobacteria_D_3__Pseudomonadales_D_4__Moraxellaceae_D_5__Enhydrobacter_D_6__unculturedbacterium	1.89279	Healthy	2.20727	0.00566436
OTU_267_D_0__Bacteria_D_1__Proteobacteria_D_2__Gammaproteobacteria_D_3__Pseudomonadales_D_4__Moraxellaceae_D_5__Moraxella_D_6__unculturedbacterium	2.4327	Healthy	2.25331	0.00804669
OTU_894_D_0__Bacteria_D_1__Actinobacteria_D_2__Actinobacteria_D_3__Micrococcales_D_4__Micrococcaceae_D_5__Rothia	2.06888	Healthy	2.2598	0.00306824
OTU_791_D_0__Bacteria_D_1__Proteobacteria	2.56796	Healthy	2.2875	0.00748672
OTU_797_D_0__Bacteria_D_1__Firmicutes_D_2__Bacilli_D_3__Bacillales_D_4__FamilyXI_D_5__Gemella	2.546	Healthy	2.29679	4.28373e-05
OTU_167_D_0__Bacteria_D_1__Firmicutes_D_2__Bacilli_D_3__Lactobacillales	2.60879	Healthy	2.37394	0.00823532
OTU_712_D_0__Bacteria_D_1__Firmicutes_D_2__Bacilli_D_3__Lactobacillales_D_4__Streptococcaceae_D_5__Streptococcus_D_6__Streptococcusferus	1.64612	Healthy	2.40426	0.022241
OTU_585_D_0__Bacteria_D_1__Proteobacteria_D_2__Alphaproteobacteria_D_3__Rhodobacterales_D_4__Rhodobacteraceae	1.73789	Healthy	2.47992	0.0442648
OTU_630_D_0__Bacteria_D_1__Proteobacteria_D_2__Gammaproteobacteria	2.2849	Healthy	2.51759	0.0431209
OTU_189_D_0__Bacteria_D_1__Proteobacteria_D_2__Gammaproteobacteria_D_3__Pasteurellales_D_4__Pasteurellaceae_D_5__Actinobacillus_D_6__Actinobacillusporcinus	2.88989	Healthy	2.54584	0.018221
OTU_1045_D_0__Bacteria_D_1__Firmicutes_D_2__Bacilli_D_3__Lactobacillales_D_4__Streptococcaceae_D_5__Streptococcus_D_6__Streptococcussp_27284_01	2.97197	Healthy	2.55286	0.00140016
OTU_150_D_0__Bacteria_D_1__Fusobacteria_D_2__Fusobacteriia_D_3__Fusobacteriales_D_4__Leptotrichiaceae_D_5__Leptotrichia	2.66609	Healthy	2.58086	0.00567524
OTU_973_D_0__Bacteria_D_1__Firmicutes_D_2__Bacilli_D_3__Lactobacillales	2.956	Healthy	2.59526	2.99358e-05
OTU_121_D_0__Bacteria_D_1__Firmicutes_D_2__Bacilli_D_3__Lactobacillales_D_4__Streptococcaceae_D_5__Streptococcus	2.88105	Healthy	2.64605	0.0201206
OTU_1041_D_0__Bacteria_D_1__Firmicutes_D_2__Bacilli_D_3__Bacillales_D_4__FamilyXI_D_5__Gemella_D_6__Gemellapalaticanis	1.36991	Healthy	2.67556	0.0173602
OTU_112_D_0__Bacteria_D_1__Bacteroidetes_D_2__Flavobacteriia_D_3__Flavobacteriales_D_4__Flavobacteriaceae_D_5__Bergeyella_D_6__unculturedbacterium	3.12239	Healthy	2.70287	3.4804e-06
OTU_402_D_0__Bacteria_D_1__Firmicutes_D_2__Bacilli_D_3__Lactobacillales_D_4__Streptococcaceae_D_5__Streptococcus	3.27601	Healthy	2.71569	0.00589087
OTU_71_D_0__Bacteria_D_1__Proteobacteria_D_2__Gammaproteobacteria_D_3__Pseudomonadales_D_4__Moraxellaceae	3.05813	Healthy	2.74549	0.000746599
OTU_906_D_0__Bacteria_D_1__Firmicutes_D_2__Bacilli_D_3__Bacillales_D_4__FamilyXI_D_5__Gemella	3.22049	Healthy	2.91117	1.48292e-08
OTU_44_D_0__Bacteria_D_1__Proteobacteria_D_2__Gammaproteobacteria_D_3__Pseudomonadales_D_4__Moraxellaceae_D_5__Moraxella	3.40289	Healthy	2.98573	2.68861e-05
OTU_52_D_0__Bacteria_D_1__Proteobacteria_D_2__Gammaproteobacteria_D_3__Pasteurellales_D_4__Pasteurellaceae	3.44627	Healthy	2.99858	0.00283884
OTU_805_D_0__Bacteria_D_1__Proteobacteria_D_2__Gammaproteobacteria_D_3__Pasteurellales_D_4__Pasteurellaceae	3.27541	Healthy	3.00182	0.0118414
OTU_20_D_0__Bacteria_D_1__Proteobacteria_D_2__Betaproteobacteria_D_3__Burkholderiales_D_4__Burkholderiaceae_D_5__Lautropia_D_6__unculturedbacterium	3.66584	Healthy	3.07116	0.037068
OTU_546_D_0__Bacteria_D_1__Firmicutes_D_2__Bacilli_D_3__Bacillales_D_4__FamilyXI_D_5__Gemella	3.40778	Healthy	3.11236	2.71539e-07
OTU_48_D_0__Bacteria_D_1__Proteobacteria_D_2__Betaproteobacteria_D_3__Neisseriales_D_4__Neisseriaceae	3.58328	Healthy	3.18065	0.023957
OTU_39_D_0__Bacteria_D_1__Firmicutes_D_2__Bacilli_D_3__Lactobacillales	3.71561	Healthy	3.25544	2.15488e-06
OTU_22_D_0__Bacteria_D_1__Firmicutes_D_2__Bacilli_D_3__Lactobacillales_D_4__Streptococcaceae_D_5__Streptococcus	3.89149	Healthy	3.44649	0.00338495
OTU_82_D_0__Bacteria_D_1__Firmicutes_D_2__Bacilli_D_3__Lactobacillales_D_4__Streptococcaceae_D_5__Streptococcus	4.03067	Healthy	3.51713	0.00477995
OTU_21_D_0__Bacteria_D_1__Proteobacteria_D_2__Betaproteobacteria_D_3__Neisseriales_D_4__Neisseriaceae	3.93339	Healthy	3.56325	0.0257415
OTU_5_D_0__Bacteria_D_1__Proteobacteria_D_2__Gammaproteobacteria_D_3__Pasteurellales_D_4__Pasteurellaceae_D_5__Actinobacillus_D_6__unculturedmethanogenicarchaeon	4.22852	Healthy	3.73082	0.00233497
OTU_10_D_0__Bacteria_D_1__Actinobacteria_D_2__Actinobacteria_D_3__Micrococcales_D_4__Micrococcaceae_D_5__Rothia	4.10168	Healthy	3.74025	0.0293432
OTU_67_D_0__Bacteria_D_1__Proteobacteria_D_2__Gammaproteobacteria_D_3__Pasteurellales_D_4__Pasteurellaceae_D_5__Actinobacillus_D_6__unculturedmethanogenicarchaeon	4.45785	Healthy	4.01043	0.00125165
OTU_9_D_0__Bacteria_D_1__Firmicutes_D_2__Bacilli_D_3__Lactobacillales_D_4__Streptococcaceae_D_5__Streptococcus	4.46558	Healthy	4.12976	0.000917522
OTU_1_D_0__Bacteria_D_1__Firmicutes_D_2__Bacilli_D_3__Bacillales_D_4__FamilyXI_D_5__Gemella_D_6__unculturedbacterium	5.58701	Healthy	5.25406	2.77977e-08
OTU_448_D_0__Archaea_D_1__Euryarchaeota_D_2__Methanobacteria_D_3__Methanobacteriales_D_4__Methanobacteriaceae_D_5__Methanobrevibacter	2.36357	Periodontitis	2.00988	0.00798232
OTU_311_D_0__Bacteria_D_1__Bacteroidetes_D_2__Bacteroidia_D_3__Bacteroidales	2.35843	Periodontitis	2.02287	0.000666636
OTU_258_D_0__Bacteria_D_1__Firmicutes_D_2__Clostridia_D_3__Clostridiales_D_4__Ruminococcaceae_D_5__Intestinimonas	2.34264	Periodontitis	2.02718	0.0477277
OTU_822_D_0__Bacteria_D_1__Proteobacteria_D_2__Betaproteobacteria_D_3__Burkholderiales_D_4__Alcaligenaceae_D_5__Sutterella_D_6__unculturedbacterium	1.58028	Periodontitis	2.03911	0.00817768
OTU_836_D_0__Bacteria_D_1__Bacteroidetes_D_2__Bacteroidia_D_3__Bacteroidales_D_4__Prevotellaceae_D_5__Alloprevotella	1.58028	Periodontitis	2.04185	0.0334973
OTU_229_D_0__Bacteria_D_1__Actinobacteria_D_2__Coriobacteriia_D_3__Coriobacteriales_D_4__Coriobacteriaceae_D_5__Enterorhabdus_D_6__unculturedbacterium	2.40728	Periodontitis	2.04405	0.000253643
OTU_273_D_0__Bacteria_D_1__Firmicutes_D_2__Clostridia_D_3__Clostridiales_D_4__FamilyXIII_D_5__IncertaeSedis_D_6___Eubacterium_nodatum	2.40728	Periodontitis	2.04705	0.0188104
OTU_520_D_0__Bacteria_D_1__Bacteroidetes_D_2__Bacteroidia_D_3__Bacteroidales_D_4__S24_7_D_5__unculturedActinomycessp__D_6__unculturedActinomycessp_	1.83209	Periodontitis	2.04846	0.0170054
OTU_589_D_0__Bacteria_D_1__Firmicutes_D_2__Clostridia_D_3__Clostridiales_D_4__Lachnospiraceae_D_5__Johnsonella	1.58028	Periodontitis	2.05328	0.00821074
OTU_327_D_0__Bacteria_D_1__Proteobacteria_D_2__Epsilonproteobacteria_D_3__Campylobacterales_D_4__Campylobacteraceae_D_5__Campylobacter	2.30338	Periodontitis	2.05832	0.0488731
OTU_753_D_0__Bacteria_D_1__Proteobacteria_D_2__Epsilonproteobacteria_D_3__Campylobacterales_D_4__Campylobacteraceae_D_5__Campylobacter	1.77657	Periodontitis	2.05874	0.0343303
OTU_765_D_0__Bacteria_D_1__Firmicutes_D_2__Clostridia_D_3__Clostridiales_D_4__Lachnospiraceae	2.18234	Periodontitis	2.05924	0.000356542
OTU_385_D_0__Bacteria_D_1__Firmicutes_D_2__Erysipelotrichia_D_3__Erysipelotrichales_D_4__Erysipelotrichaceae_D_5__Sharpea_D_6__unculturedbacterium	2.42538	Periodontitis	2.06473	0.000277605
OTU_416_D_0__Bacteria_D_1__Bacteroidetes_D_2__Bacteroidia_D_3__Bacteroidales_D_4__Rikenellaceae_D_5__RC9gutgroup	2.34264	Periodontitis	2.0655	0.000357917
OTU_285_D_0__Bacteria_D_1__Firmicutes_D_2__Clostridia_D_3__Clostridiales_D_4__Lachnospiraceae	2.29148	Periodontitis	2.06571	0.0147545
OTU_501_D_0__Bacteria_D_1__Spirochaetae_D_2__Spirochaetes_D_3__Spirochaetales_D_4__Spirochaetaceae_D_5__Treponema	2.33178	Periodontitis	2.06828	0.0304123
OTU_384_D_0__Bacteria_D_1__Bacteroidetes_D_2__Bacteroidia_D_3__Bacteroidales_D_4__p_2534_18B5gutgroup_D_5__unculturedbacterium_D_6__unculturedbacterium	2.37863	Periodontitis	2.07228	7.85936e-05
OTU_308_D_0__Bacteria_D_1__Firmicutes_D_2__Erysipelotrichia_D_3__Erysipelotrichales_D_4__Erysipelotrichaceae_D_5__Solobacterium_D_6__unculturedbacterium	2.44275	Periodontitis	2.08004	5.33362e-05
OTU_263_D_0__Bacteria_D_1__Firmicutes_D_2__Clostridia_D_3__Clostridiales_D_4__Lachnospiraceae	2.31497	Periodontitis	2.08486	9.59913e-06
OTU_336_D_0__Bacteria_D_1__Firmicutes_D_2__Clostridia_D_3__Clostridiales_D_4__FamilyXIII_D_5__Mogibacterium	2.42979	Periodontitis	2.09608	0.000114583
OTU_307_D_0__Bacteria_D_1__Firmicutes_D_2__Clostridia_D_3__Clostridiales_D_4__Peptococcaceae_D_5__Peptococcus	2.04694	Periodontitis	2.11983	0.016028
OTU_284_D_0__Bacteria_D_1__Firmicutes_D_2__Clostridia_D_3__Clostridiales_D_4__FamilyXIII	2.273	Periodontitis	2.12155	0.000294079
OTU_441_D_0__Bacteria_D_1__Firmicutes_D_2__Erysipelotrichia_D_3__Erysipelotrichales_D_4__Erysipelotrichaceae_D_5__Solobacterium_D_6__unculturedbacterium	2.47948	Periodontitis	2.12447	0.000109693
OTU_281_D_0__Bacteria_D_1__Firmicutes_D_2__Negativicutes_D_3__Selenomonadales_D_4__Veillonellaceae	2.42092	Periodontitis	2.12839	0.001807
OTU_272_D_0__Bacteria_D_1__Synergistetes_D_2__Synergistia_D_3__Synergistales_D_4__Synergistaceae_D_5__Synergistes_D_6__unculturedrumenbacterium	2.41188	Periodontitis	2.13072	0.00389069
OTU_464_D_0__Bacteria_D_1__Firmicutes_D_2__Erysipelotrichia_D_3__Erysipelotrichales_D_4__Erysipelotrichaceae_D_5__uncultured_D_6__Erysipelotrichaceaebacteriumcanineoraltaxon255	2.2537	Periodontitis	2.13176	0.0170388
OTU_488_D_0__Bacteria_D_1__Actinobacteria_D_2__Coriobacteriia_D_3__Coriobacteriales_D_4__Coriobacteriaceae_D_5__Atopobium_D_6__Atopobiumsp_canineoraltaxon418	1.73518	Periodontitis	2.1318	0.00176345
OTU_386_D_0__Bacteria_D_1__Bacteroidetes_D_2__Bacteroidia_D_3__Bacteroidales_D_4__Prevotellaceae_D_5__Prevotella_D_6__unculturedbacterium	2.41642	Periodontitis	2.13372	0.000773044
OTU_878_D_0__Bacteria_D_1__Firmicutes_D_2__Clostridia_D_3__Clostridiales_D_4__Peptostreptococcaceae_D_5__Filifactor_D_6__Filifactorvillosus	2.42538	Periodontitis	2.13448	0.031715
OTU_548_D_0__Bacteria_D_1__Firmicutes_D_2__Erysipelotrichia_D_3__Erysipelotrichales_D_4__Erysipelotrichaceae_D_5__uncultured_D_6__unculturedbacterium	1.89655	Periodontitis	2.13664	0.0202317
OTU_477_D_0__Bacteria_D_1__Firmicutes_D_2__Clostridia_D_3__Clostridiales_D_4__Lachnospiraceae_D_5__Roseburia_D_6__unculturedrumenbacterium2C28d_7	2.0776	Periodontitis	2.13682	0.0170054
OTU_430_D_0__Bacteria_D_1__CandidatedivisionTM7_D_2__UnknownClass_D_3__UnknownOrder_D_4__UnknownFamily_D_5__CandidatusSaccharimonas_D_6__unculturedbacterium	2.47948	Periodontitis	2.1437	0.000215087
OTU_283_D_0__Bacteria_D_1__Firmicutes_D_2__Clostridia_D_3__Clostridiales_D_4__FamilyXIII_D_5__Mogibacterium_D_6__unculturedbacterium	2.51333	Periodontitis	2.14732	0.000561512
OTU_388_D_0__Bacteria_D_1__Bacteroidetes_D_2__Bacteroidia_D_3__Bacteroidales_D_4__Rikenellaceae_D_5__RC9gutgroup	2.45534	Periodontitis	2.14881	0.0348176
OTU_268_D_0__Bacteria_D_1__Firmicutes_D_2__Clostridia_D_3__Clostridiales_D_4__Lachnospiraceae_D_5__uncultured_D_6__Blautiasp_canineoraltaxon337	2.44275	Periodontitis	2.14998	0.0304123
OTU_305_D_0__Bacteria_D_1__Bacteroidetes_D_2__Bacteroidia_D_3__Bacteroidales_D_4__Prevotellaceae_D_5__Prevotella	2.59851	Periodontitis	2.15328	0.0334536
OTU_352_D_0__Bacteria_D_1__Spirochaetae_D_2__Spirochaetes_D_3__Spirochaetales_D_4__Spirochaetaceae_D_5__Treponema_D_6__unidentified	2.48723	Periodontitis	2.15514	0.00131176
OTU_847_D_0__Bacteria_D_1__Actinobacteria_D_2__Coriobacteriia_D_3__Coriobacteriales_D_4__Coriobacteriaceae	1.2123	Periodontitis	2.15724	0.0347728
OTU_246_D_0__Bacteria_D_1__Firmicutes_D_2__Clostridia_D_3__Clostridiales_D_4__Ruminococcaceae_D_5__uncultured	2.47554	Periodontitis	2.1652	0.00173334
OTU_294_D_0__Bacteria_D_1__Actinobacteria_D_2__Coriobacteriia_D_3__Coriobacteriales_D_4__Coriobacteriaceae	2.39319	Periodontitis	2.16724	0.000347011
OTU_664_D_0__Bacteria_D_1__Bacteroidetes_D_2__Bacteroidia_D_3__Bacteroidales_D_4__Prevotellaceae	1.92551	Periodontitis	2.16937	0.0406918
OTU_437_D_0__Bacteria_D_1__Chloroflexi_D_2__Anaerolineae_D_3__Anaerolineales_D_4__Anaerolineaceae_D_5__uncultured_D_6__Chloroflexibacteriumcanineoraltaxon408	2.45119	Periodontitis	2.17632	0.0349722
OTU_1317_D_0__Archaea_D_1__Euryarchaeota_D_2__Methanobacteria_D_3__Methanobacteriales_D_4__Methanobacteriaceae_D_5__Methanobrevibacter_D_6__unculturedrumenmethanogen	1.5481	Periodontitis	2.18099	0.0170388
OTU_363_D_0__Bacteria_D_1__Spirochaetae_D_2__Spirochaetes_D_3__Spirochaetales_D_4__Spirochaetaceae_D_5__Treponema_D_6__Treponemasp_oraltaxon250	2.40728	Periodontitis	2.18148	0.00180441
OTU_468_D_0__Bacteria_D_1__Firmicutes_D_2__Negativicutes_D_3__Selenomonadales_D_4__Veillonellaceae_D_5__Mitsuokella_D_6__unculturedbacterium	2.43415	Periodontitis	2.18558	4.4284e-07
OTU_291_D_0__Bacteria_D_1__Bacteroidetes_D_2__Bacteroidia_D_3__Bacteroidales_D_4__Prevotellaceae_D_5__Prevotella	2.53796	Periodontitis	2.19126	0.00882001
OTU_329_D_0__Bacteria_D_1__Firmicutes_D_2__Negativicutes_D_3__Selenomonadales_D_4__Veillonellaceae_D_5__Selenomonas	2.38354	Periodontitis	2.19435	0.0170388
OTU_243_D_0__Bacteria_D_1__Bacteroidetes_D_2__Bacteroidia_D_3__Bacteroidales_D_4__S24_7_D_5__unculturedbacterium_D_6__unculturedbacterium	2.64098	Periodontitis	2.1957	0.00521926
OTU_269_D_0__Bacteria_D_1__Proteobacteria_D_2__Betaproteobacteria_D_3__Neisseriales_D_4__Neisseriaceae	2.52406	Periodontitis	2.19921	0.0321804
OTU_454_D_0__Bacteria_D_1__Bacteroidetes_D_2__Bacteroidia_D_3__Bacteroidales_D_4__Prevotellaceae_D_5__Prevotella	2.58644	Periodontitis	2.20572	0.0299843
OTU_223_D_0__Bacteria_D_1__Actinobacteria_D_2__Coriobacteriia_D_3__Coriobacteriales_D_4__Coriobacteriaceae_D_5__Atopobium_D_6__Atopobiumminutum10063974	2.53796	Periodontitis	2.20714	1.98172e-07
OTU_892_D_0__Bacteria_D_1__Proteobacteria_D_2__Gammaproteobacteria_D_3__Pseudomonadales_D_4__Pseudomonadaceae_D_5__Pseudomonas_D_6__Pseudomonaslundensis	2.36865	Periodontitis	2.20788	0.000215525
OTU_261_D_0__Bacteria_D_1__Firmicutes_D_2__Bacilli_D_3__Lactobacillales_D_4__Lactobacillaceae_D_5__Lactobacillus_D_6__unculturedmethanogenicarchaeon	2.49861	Periodontitis	2.21531	0.000359019
OTU_174_D_0__Bacteria_D_1__Firmicutes_D_2__Clostridia_D_3__Clostridiales_D_4__FamilyXIII	2.62728	Periodontitis	2.21746	0.00208664
OTU_244_D_0__Bacteria_D_1__Fusobacteria_D_2__Fusobacteriia_D_3__Fusobacteriales_D_4__Leptotrichiaceae_D_5__Leptotrichia	2.58644	Periodontitis	2.21749	0.000270623
OTU_215_D_0__Bacteria_D_1__Tenericutes_D_2__Mollicutes_D_3__RF9_D_4__Acholeplasmatalesbacteriumcanineoraltaxon316_D_5__Acholeplasmatalesbacteriumcanineoraltaxon316_D_6__Acholeplasmatalesbacteriumcanineoraltaxon316	2.57403	Periodontitis	2.22921	0.00325147
OTU_321_D_0__Bacteria_D_1__Tenericutes_D_2__Mollicutes_D_3__Acholeplasmatales_D_4__Acholeplasmataceae_D_5__Acholeplasma_D_6__Acholeplasmatalesbacteriumcanineoraltaxon172	2.53796	Periodontitis	2.22995	0.0304123
OTU_364_D_0__Bacteria_D_1__Firmicutes_D_2__Negativicutes_D_3__Selenomonadales_D_4__Veillonellaceae_D_5__Megasphaera_D_6__Megasphaerasp_TrE9262	2.57403	Periodontitis	2.23653	8.27879e-05
OTU_338_D_0__Bacteria_D_1__Firmicutes_D_2__Negativicutes_D_3__Selenomonadales_D_4__Veillonellaceae	2.273	Periodontitis	2.23709	0.0105464
OTU_287_D_0__Bacteria_D_1__Firmicutes_D_2__Clostridia_D_3__Clostridiales_D_4__FamilyXIII_D_5__IncertaeSedis	2.55142	Periodontitis	2.2374	1.19527e-05
OTU_325_D_0__Bacteria_D_1__Bacteroidetes_D_2__Bacteroidia_D_3__Bacteroidales_D_4__Prevotellaceae	2.48337	Periodontitis	2.24991	0.00389877
OTU_945_D_0__Bacteria_D_1__Firmicutes_D_2__Clostridia_D_3__Clostridiales_D_4__Ruminococcaceae_D_5__uncultured	1.33724	Periodontitis	2.25391	0.0347952
OTU_270_D_0__Bacteria_D_1__Bacteroidetes_D_2__Bacteroidia_D_3__Bacteroidales_D_4__Rikenellaceae_D_5__RC9gutgroup	2.58644	Periodontitis	2.28575	0.0291321
OTU_276_D_0__Archaea_D_1__Euryarchaeota_D_2__Methanobacteria_D_3__Methanobacteriales_D_4__Methanobacteriaceae_D_5__Methanobrevibacter_D_6__unculturedarchaeon	2.63555	Periodontitis	2.28663	0.000276941
OTU_182_D_0__Bacteria_D_1__Firmicutes_D_2__Clostridia_D_3__Clostridiales_D_4__Lachnospiraceae	2.71971	Periodontitis	2.28827	0.00019311
OTU_361_D_0__Bacteria_D_1__Proteobacteria_D_2__Deltaproteobacteria_D_3__Desulfuromonadales_D_4__GR_WP33_58_D_5__unculturedrumenbacterium_D_6__unculturedrumenbacterium	2.57717	Periodontitis	2.29154	0.0170388
OTU_183_D_0__Bacteria_D_1__Firmicutes_D_2__Erysipelotrichia_D_3__Erysipelotrichales_D_4__Erysipelotrichaceae_D_5__Kandleria_D_6__unidentified	2.74591	Periodontitis	2.29762	0.0345889
OTU_500_D_0__Bacteria_D_1__Bacteroidetes_D_2__Bacteroidia_D_3__Bacteroidales_D_4__Prevotellaceae_D_5__Prevotella	2.57403	Periodontitis	2.30382	0.0438442
OTU_161_D_0__Bacteria_D_1__Bacteroidetes_D_2__Bacteroidia_D_3__Bacteroidales_D_4__Rikenellaceae_D_5__RC9gutgroup	2.80522	Periodontitis	2.33114	0.00209153
OTU_262_D_0__Bacteria_D_1__Firmicutes_D_2__Bacilli_D_3__Lactobacillales_D_4__Streptococcaceae_D_5__Streptococcus_D_6__Streptococcusminor	2.77061	Periodontitis	2.33326	0.0480914
OTU_277_D_0__Bacteria_D_1__Firmicutes_D_2__Clostridia_D_3__Clostridiales_D_4__Christensenellaceae_D_5__uncultured_D_6__Clostridialesbacteriumcanineoraltaxon141	2.71971	Periodontitis	2.33422	3.93653e-05
OTU_199_D_0__Bacteria_D_1__Firmicutes_D_2__Clostridia_D_3__Clostridiales_D_4__Lachnospiraceae_D_5__Roseburia	2.6722	Periodontitis	2.33505	0.000359296
OTU_739_D_0__Bacteria_D_1__Firmicutes_D_2__Bacilli_D_3__Lactobacillales_D_4__Lactobacillaceae_D_5__Lactobacillus	2.58028	Periodontitis	2.33954	0.000816245
OTU_627_D_0__Bacteria_D_1__Firmicutes_D_2__Bacilli_D_3__Lactobacillales_D_4__Streptococcaceae_D_5__Streptococcus_D_6__Streptococcusminor	2.68942	Periodontitis	2.34095	0.0260347
OTU_205_D_0__Bacteria_D_1__Firmicutes_D_2__Clostridia_D_3__Clostridiales_D_4__Lachnospiraceae_D_5__Butyrivibrio_D_6__unculturedbacterium	2.73301	Periodontitis	2.34216	0.00292517
OTU_224_D_0__Bacteria_D_1__Firmicutes_D_2__Bacilli_D_3__Lactobacillales_D_4__Lactobacillaceae_D_5__Lactobacillus	2.71291	Periodontitis	2.34725	0.0116154
OTU_222_D_0__Bacteria_D_1__Bacteroidetes_D_2__Bacteroidia_D_3__Bacteroidales_D_4__RF16	2.63555	Periodontitis	2.34916	0.00415993
OTU_216_D_0__Bacteria_D_1__Firmicutes_D_2__Clostridia_D_3__Clostridiales_D_4__Lachnospiraceae	2.66715	Periodontitis	2.35276	2.52393e-05
OTU_192_D_0__Bacteria_D_1__Firmicutes_D_2__Clostridia_D_3__Clostridiales_D_4__FamilyXI_D_5__Gallicola	2.65687	Periodontitis	2.35935	0.038917
OTU_400_D_0__Bacteria_D_1__Bacteroidetes_D_2__Bacteroidia_D_3__Bacteroidales_D_4__Rikenellaceae_D_5__RC9gutgroup_D_6__unculturedbacterium	2.64634	Periodontitis	2.36446	0.0153966
OTU_193_D_0__Bacteria_D_1__Firmicutes_D_2__Clostridia_D_3__Clostridiales_D_4__Lachnospiraceae	2.68942	Periodontitis	2.36606	9.50003e-06
OTU_210_D_0__Bacteria_D_1__Firmicutes_D_2__Clostridia_D_3__Clostridiales_D_4__Lachnospiraceae_D_5__Butyrivibrio	2.71061	Periodontitis	2.37113	0.000348613
OTU_169_D_0__Bacteria_D_1__Firmicutes_D_2__Clostridia_D_3__Clostridiales_D_4__Lachnospiraceae_D_5__Catonella_D_6__unculturedbacterium	2.67966	Periodontitis	2.37269	0.0238497
OTU_433_D_0__Bacteria_D_1__Actinobacteria_D_2__Actinobacteria_D_3__Actinomycetales_D_4__Actinomycetaceae_D_5__Actinomyces	2.7543	Periodontitis	2.37316	0.00242691
OTU_208_D_0__Bacteria_D_1__Firmicutes_D_2__Erysipelotrichia_D_3__Erysipelotrichales_D_4__Erysipelotrichaceae	2.56769	Periodontitis	2.38537	0.0269586
OTU_252_D_0__Bacteria_D_1__Firmicutes_D_2__Negativicutes_D_3__Selenomonadales_D_4__Veillonellaceae_D_5__uncultured_D_6__swinefecalbacteriumRF3F_Cel1	2.70132	Periodontitis	2.3952	0.00081685
OTU_289_D_0__Bacteria_D_1__Bacteroidetes_D_2__Bacteroidia_D_3__Bacteroidales	2.71745	Periodontitis	2.39531	6.51162e-05
OTU_160_D_0__Bacteria_D_1__Firmicutes_D_2__Clostridia_D_3__Clostridiales_D_4__Lachnospiraceae_D_5__Acetitomaculum	2.77854	Periodontitis	2.40995	1.1919e-06
OTU_191_D_0__Bacteria_D_1__Actinobacteria_D_2__Actinobacteria_D_3__Actinomycetales_D_4__Actinomycetaceae_D_5__Actinomyces_D_6__Actinomycessp_canineoraltaxon412	2.84409	Periodontitis	2.42181	0.00609734
OTU_140_D_0__Bacteria_D_1__Bacteroidetes_D_2__Bacteroidia_D_3__Bacteroidales_D_4__Prevotellaceae	2.86229	Periodontitis	2.4232	0.0078219
OTU_259_D_0__Bacteria_D_1__Actinobacteria_D_2__Actinobacteria_D_3__Bifidobacteriales_D_4__Bifidobacteriaceae	2.79399	Periodontitis	2.42758	3.05448e-05
OTU_198_D_0__Bacteria_D_1__Actinobacteria_D_2__Actinobacteria_D_3__Actinomycetales_D_4__Actinomycetaceae_D_5__Actinomyces_D_6__unculturedbacterium	2.78826	Periodontitis	2.43385	0.000176634
OTU_1326_D_0__Bacteria_D_1__Bacteroidetes_D_2__Bacteroidia_D_3__Bacteroidales_D_4__Prevotellaceae_D_5__Prevotella	1.27925	Periodontitis	2.43827	0.00812274
OTU_339_D_0__Bacteria_D_1__Firmicutes_D_2__Bacilli_D_3__Lactobacillales_D_4__Lactobacillaceae_D_5__Lactobacillus	2.76049	Periodontitis	2.44133	0.000468421
OTU_184_D_0__Bacteria_D_1__Firmicutes_D_2__Clostridia_D_3__Clostridiales_D_4__FamilyXIII_D_5__IncertaeSedis	2.74378	Periodontitis	2.44331	1.05662e-05
OTU_260_D_0__Bacteria_D_1__Firmicutes_D_2__Erysipelotrichia_D_3__Erysipelotrichales_D_4__Erysipelotrichaceae_D_5__Solobacterium_D_6__Solobacteriummoorei	2.79209	Periodontitis	2.46243	0.000177768
OTU_265_D_0__Bacteria_D_1__Actinobacteria_D_2__Coriobacteriia_D_3__Coriobacteriales_D_4__Coriobacteriaceae_D_5__Olsenella_D_6__unculturedbacterium	2.82332	Periodontitis	2.4648	0.0115761
OTU_245_D_0__Bacteria_D_1__Spirochaetae_D_2__Spirochaetes_D_3__Spirochaetales_D_4__Spirochaetaceae_D_5__Treponema_D_6__unculturedrumenbacterium	2.93794	Periodontitis	2.46873	0.01705
OTU_148_D_0__Bacteria_D_1__Firmicutes_D_2__Clostridia_D_3__Clostridiales_D_4__Christensenellaceae_D_5__uncultured_D_6__Clostridialesbacteriumcanineoraltaxon386	2.78246	Periodontitis	2.47076	0.00180184
OTU_264_D_0__Bacteria_D_1__Firmicutes_D_2__Clostridia_D_3__Clostridiales_D_4__Lachnospiraceae_D_5__Lachnospira_D_6__unculturedbacterium	2.81073	Periodontitis	2.47482	0.0056554
OTU_124_D_0__Bacteria_D_1__Firmicutes_D_2__Bacilli_D_3__Lactobacillales_D_4__Streptococcaceae_D_5__Streptococcus	2.82509	Periodontitis	2.48532	0.0122575
OTU_936_D_0__Bacteria_D_1__Firmicutes_D_2__Clostridia_D_3__Clostridiales_D_4__FamilyXIII_D_5__IncertaeSedis_D_6__unculturedEubacteriaceaebacterium	2.88131	Periodontitis	2.48913	3.53401e-05
OTU_144_D_0__Bacteria_D_1__Firmicutes_D_2__Clostridia_D_3__Clostridiales_D_4__Lachnospiraceae_D_5__IncertaeSedis	2.83209	Periodontitis	2.49056	0.00460452
OTU_181_D_0__Bacteria_D_1__Firmicutes_D_2__Clostridia_D_3__Clostridiales_D_4__Lachnospiraceae_D_5__IncertaeSedis_D_6__unculturedrumenbacterium	2.99166	Periodontitis	2.49407	0.00605667
OTU_214_D_0__Bacteria_D_1__Spirochaetae_D_2__Spirochaetes_D_3__Spirochaetales_D_4__Spirochaetaceae_D_5__Treponema	2.81255	Periodontitis	2.50238	0.031715
OTU_176_D_0__Bacteria_D_1__Bacteroidetes_D_2__Bacteroidia_D_3__Bacteroidales_D_4__Prevotellaceae	2.86066	Periodontitis	2.51591	0.00879262
OTU_297_D_0__Bacteria_D_1__CandidatedivisionTM7_D_2__UnknownClass_D_3__UnknownOrder_D_4__UnknownFamily_D_5__CandidatusSaccharimonas_D_6__unculturedbacterium	2.79776	Periodontitis	2.52186	0.0192009
OTU_152_D_0__Bacteria_D_1__Bacteroidetes_D_2__Bacteroidia_D_3__Bacteroidales_D_4__Bacteroidaceae_D_5__Bacteroides_D_6__bacteriumNLAE_zl_G73	2.86229	Periodontitis	2.52871	0.0348176
OTU_190_D_0__Bacteria_D_1__Bacteroidetes_D_2__Bacteroidia_D_3__Bacteroidales_D_4__Porphyromonadaceae_D_5__Tannerella_D_6__unculturedbacterium	2.77261	Periodontitis	2.53542	0.00119298
OTU_178_D_0__Bacteria_D_1__Proteobacteria_D_2__Deltaproteobacteria_D_3__Desulfovibrionales_D_4__Desulfovibrionaceae_D_5__Desulfovibrio_D_6__unculturedDesulfovibriosp_	3.01508	Periodontitis	2.55151	0.000444197
OTU_166_D_0__Bacteria_D_1__CandidatedivisionTM7	2.8574	Periodontitis	2.55712	0.00197498
OTU_147_D_0__Bacteria_D_1__Firmicutes_D_2__Clostridia_D_3__Clostridiales_D_4__Lachnospiraceae_D_5__Oribacterium	2.88747	Periodontitis	2.55814	6.71084e-05
OTU_118_D_0__Bacteria_D_1__Firmicutes_D_2__Clostridia_D_3__Clostridiales_D_4__FamilyXIII_D_5__Anaerovorax	2.9227	Periodontitis	2.56131	0.00319771
OTU_187_D_0__Bacteria_D_1__Bacteroidetes_D_2__Bacteroidia_D_3__Bacteroidales_D_4__Prevotellaceae_D_5__Prevotella_D_6__unculturedbacterium	2.93246	Periodontitis	2.56488	4.4433e-05
OTU_180_D_0__Bacteria_D_1__Firmicutes_D_2__Clostridia_D_3__Clostridiales_D_4__Lachnospiraceae_D_5__Stomatobaculum_D_6__unculturedbacterium	2.95003	Periodontitis	2.5654	6.46389e-05
OTU_212_D_0__Archaea_D_1__Euryarchaeota_D_2__Thermoplasmata_D_3__Thermoplasmatales_D_4__ThermoplasmatalesIncertaeSedis_D_5__CandidatusMethanomethylophilus_D_6__ThermoplasmatalesarchaeonBRNA1	2.93108	Periodontitis	2.57071	0.0001532
OTU_133_D_0__Bacteria_D_1__Firmicutes_D_2__Clostridia_D_3__Clostridiales_D_4__Christensenellaceae_D_5__uncultured_D_6__Clostridialesbacteriumcanineoraltaxon141	2.96307	Periodontitis	2.58244	0.0012105
OTU_163_D_0__Bacteria_D_1__Firmicutes_D_2__Clostridia_D_3__Clostridiales_D_4__FamilyXIII_D_5__Mogibacterium_D_6__unculturedEubacteriaceaebacterium	2.9566	Periodontitis	2.58465	9.75973e-06
OTU_135_D_0__Bacteria_D_1__Firmicutes_D_2__Clostridia_D_3__Clostridiales_D_4__Lachnospiraceae_D_5__Syntrophococcus_D_6__unculturedbacterium	3.0047	Periodontitis	2.59638	5.93503e-05
OTU_146_D_0__Bacteria_D_1__CandidatedivisionTM7_D_2__UnknownClass_D_3__UnknownOrder_D_4__UnknownFamily_D_5__CandidatusSaccharimonas	2.99045	Periodontitis	2.60047	0.00386417
OTU_235_D_0__Bacteria_D_1__Bacteroidetes_D_2__Bacteroidia_D_3__Bacteroidales_D_4__Porphyromonadaceae_D_5__Porphyromonas_D_6__Porphyromonasendodontalis	2.9227	Periodontitis	2.60783	0.00128462
OTU_136_D_0__Bacteria_D_1__Firmicutes_D_2__Clostridia_D_3__Clostridiales_D_4__Peptococcaceae_D_5__Peptococcus_D_6__Peptococcussp_canineoraltaxon334	2.95003	Periodontitis	2.61368	1.55211e-06
OTU_173_D_0__Bacteria_D_1__Firmicutes_D_2__Negativicutes_D_3__Selenomonadales_D_4__Veillonellaceae_D_5__Dialister	2.83727	Periodontitis	2.61463	0.00823281
OTU_230_D_0__Bacteria_D_1__Firmicutes_D_2__Negativicutes_D_3__Selenomonadales_D_4__Veillonellaceae	2.84069	Periodontitis	2.6149	9.61658e-06
OTU_231_D_0__Bacteria_D_1__Bacteroidetes_D_2__Bacteroidia_D_3__Bacteroidales_D_4__Prevotellaceae_D_5__Prevotella_D_6__unculturedbacterium	3.18697	Periodontitis	2.62496	0.00144264
OTU_704_D_0__Bacteria_D_1__Firmicutes_D_2__Bacilli_D_3__Lactobacillales_D_4__Streptococcaceae_D_5__Streptococcus	2.93246	Periodontitis	2.62653	0.00381704
OTU_93_D_0__Bacteria_D_1__Firmicutes_D_2__Clostridia_D_3__Clostridiales_D_4__Lachnospiraceae_D_5__Johnsonella	3.04053	Periodontitis	2.63007	0.000366236
OTU_131_D_0__Bacteria_D_1__Firmicutes_D_2__Clostridia_D_3__Clostridiales_D_4__Peptostreptococcaceae_D_5__Peptostreptococcus_D_6__unculturedbacterium	2.99286	Periodontitis	2.64022	0.00815436
OTU_254_D_0__Bacteria_D_1__Bacteroidetes_D_2__Bacteroidia_D_3__Bacteroidales_D_4__Prevotellaceae_D_5__Prevotella	2.93384	Periodontitis	2.64143	0.0288948
OTU_130_D_0__Bacteria_D_1__Firmicutes_D_2__Clostridia_D_3__Clostridiales_D_4__Christensenellaceae_D_5__uncultured	2.95135	Periodontitis	2.64173	0.00702148
OTU_330_D_0__Bacteria_D_1__Firmicutes_D_2__Negativicutes_D_3__Selenomonadales_D_4__Veillonellaceae_D_5__Dialister	3.02965	Periodontitis	2.64801	8.72741e-05
OTU_155_D_0__Bacteria_D_1__Bacteroidetes_D_2__Bacteroidia_D_3__Bacteroidales_D_4__Prevotellaceae_D_5__Prevotella_D_6__unculturedbacterium	3.01961	Periodontitis	2.65191	0.00252679
OTU_175_D_0__Bacteria_D_1__Fusobacteria_D_2__Fusobacteriia_D_3__Fusobacteriales_D_4__Leptotrichiaceae_D_5__Leptotrichia_D_6__unculturedbacterium	3.02186	Periodontitis	2.65473	0.0318704
OTU_122_D_0__Bacteria_D_1__Firmicutes_D_2__Clostridia_D_3__Clostridiales_D_4__Peptostreptococcaceae_D_5__Filifactor_D_6__unculturedbacterium	3.08154	Periodontitis	2.65763	0.00859763
OTU_119_D_0__Bacteria_D_1__Synergistetes_D_2__Synergistia_D_3__Synergistales_D_4__Synergistaceae_D_5__Fretibacterium_D_6__Synergistetesbacteriumoraltaxon363	3.03404	Periodontitis	2.66182	0.000297021
OTU_172_D_0__Bacteria_D_1__Firmicutes_D_2__Clostridia_D_3__Clostridiales_D_4__vadinBB60_D_5__Clostridialesbacteriumcanineoraltaxon260_D_6__Clostridialesbacteriumcanineoraltaxon260	2.89505	Periodontitis	2.66913	0.034728
OTU_1308_D_0__Bacteria_D_1__Firmicutes_D_2__Negativicutes_D_3__Selenomonadales_D_4__Veillonellaceae_D_5__Megasphaera_D_6__unculturedbacterium	3.10533	Periodontitis	2.68287	0.000747934
OTU_232_D_0__Bacteria_D_1__Spirochaetae_D_2__Spirochaetes_D_3__Spirochaetales_D_4__Spirochaetaceae_D_5__Treponema_D_6__Treponemamediumsubsp_bovis	3.00818	Periodontitis	2.69063	0.000131944
OTU_143_D_0__Bacteria_D_1__Proteobacteria_D_2__Epsilonproteobacteria_D_3__Campylobacterales_D_4__Campylobacteraceae_D_5__Campylobacter_D_6__unculturedorganism	3.08349	Periodontitis	2.69707	7.73017e-06
OTU_162_D_0__Bacteria_D_1__Firmicutes_D_2__Bacilli_D_3__Lactobacillales_D_4__Lactobacillaceae_D_5__Lactobacillus_D_6__Lactobacillussalivarius	3.02633	Periodontitis	2.69993	0.0408512
OTU_239_D_0__Bacteria_D_1__Bacteroidetes_D_2__Bacteroidia_D_3__Bacteroidales_D_4__Prevotellaceae_D_5__Prevotella	3.01508	Periodontitis	2.71191	0.00135133
OTU_156_D_0__Bacteria_D_1__Proteobacteria_D_2__Deltaproteobacteria_D_3__Desulfobacterales_D_4__Desulfobulbaceae_D_5__Desulfobulbus_D_6__Desulfobulbussp_oraltaxon041str_Dsb1_5	3.12523	Periodontitis	2.71369	2.5393e-05
OTU_238_D_0__Bacteria_D_1__Bacteroidetes_D_2__Bacteroidia_D_3__Bacteroidales_D_4__Prevotellaceae_D_5__Prevotella	3.04799	Periodontitis	2.72108	1.59288e-05
OTU_429_D_0__Bacteria_D_1__Synergistetes_D_2__Synergistia_D_3__Synergistales_D_4__Synergistaceae	3.00934	Periodontitis	2.72141	0.00125216
OTU_97_D_0__Bacteria_D_1__Firmicutes_D_2__Clostridia_D_3__Clostridiales_D_4__Lachnospiraceae_D_5__Roseburia_D_6__unculturedLachnospiraceaebacterium	3.1172	Periodontitis	2.72571	0.009186
OTU_142_D_0__Bacteria_D_1__Firmicutes_D_2__Negativicutes_D_3__Selenomonadales_D_4__Veillonellaceae_D_5__Veillonella	3.02074	Periodontitis	2.72947	0.000477381
OTU_141_D_0__Bacteria_D_1__Bacteroidetes_D_2__Bacteroidia_D_3__Bacteroidales_D_4__Porphyromonadaceae_D_5__Odoribacter_D_6__Odoribacterdenticanis	3.06152	Periodontitis	2.72956	0.00104269
OTU_201_D_0__Bacteria_D_1__Bacteroidetes_D_2__Bacteroidia_D_3__Bacteroidales_D_4__Prevotellaceae	3.12788	Periodontitis	2.74238	0.000325531
OTU_154_D_0__Bacteria_D_1__Firmicutes_D_2__Clostridia_D_3__Clostridiales_D_4__Lachnospiraceae	2.98069	Periodontitis	2.75752	0.000511214
OTU_145_D_0__Bacteria_D_1__Bacteroidetes_D_2__Bacteroidia_D_3__Bacteroidales_D_4__Prevotellaceae_D_5__Prevotella	3.11267	Periodontitis	2.76759	0.00776783
OTU_200_D_0__Bacteria_D_1__Bacteroidetes_D_2__Bacteroidia_D_3__Bacteroidales_D_4__Prevotellaceae_D_5__Prevotella	3.09025	Periodontitis	2.78066	1.22296e-05
OTU_204_D_0__Bacteria_D_1__Actinobacteria_D_2__Actinobacteria_D_3__Actinomycetales_D_4__Actinomycetaceae_D_5__Actinomyces	3.127	Periodontitis	2.78629	0.000470602
OTU_179_D_0__Bacteria_D_1__Actinobacteria_D_2__Coriobacteriia_D_3__Coriobacteriales_D_4__Coriobacteriaceae_D_5__Atopobium_D_6__unculturedbacterium	3	Periodontitis	2.79581	6.78422e-05
OTU_139_D_0__Bacteria_D_1__Bacteroidetes_D_2__Bacteroidia_D_3__Bacteroidales_D_4__Porphyromonadaceae_D_5__Tannerella_D_6__Tannerellaforsythia	3.10067	Periodontitis	2.79693	0.00165694
OTU_194_D_0__Bacteria_D_1__CandidatedivisionTM7	3.16169	Periodontitis	2.81481	0.00218989
OTU_94_D_0__Bacteria_D_1__Firmicutes_D_2__Clostridia_D_3__Clostridiales_D_4__FamilyXI_D_5__Parvimonas	3.27426	Periodontitis	2.83574	5.55812e-05
OTU_96_D_0__Bacteria_D_1__Firmicutes_D_2__Clostridia_D_3__Clostridiales_D_4__FamilyXI_D_5__Finegoldia	3.2537	Periodontitis	2.85296	0.000978173
OTU_171_D_0__Bacteria_D_1__Bacteroidetes_D_2__Flavobacteriia_D_3__Flavobacteriales_D_4__Flavobacteriaceae_D_5__Flavobacterium_D_6__Flavobacteriumsp_NW18	3.12876	Periodontitis	2.85886	0.01705
OTU_100_D_0__Bacteria_D_1__Firmicutes_D_2__Clostridia_D_3__Clostridiales_D_4__FamilyXIII_D_5__IncertaeSedis	3.19533	Periodontitis	2.86841	0.0190187
OTU_129_D_0__Bacteria_D_1__Bacteroidetes_D_2__Bacteroidia_D_3__Bacteroidales_D_4__Prevotellaceae_D_5__Alloprevotella	3.3028	Periodontitis	2.88744	1.81423e-05
OTU_92_D_0__Bacteria_D_1__Firmicutes_D_2__Negativicutes_D_3__Selenomonadales_D_4__Veillonellaceae_D_5__Megasphaera	3.2209	Periodontitis	2.89313	2.3431e-06
OTU_111_D_0__Bacteria_D_1__CandidatedivisionTM7_D_2__UnknownClass_D_3__UnknownOrder_D_4__UnknownFamily_D_5__CandidatusSaccharimonas_D_6__unculturedbacterium	3.22303	Periodontitis	2.90045	0.00275534
OTU_132_D_0__Bacteria_D_1__Spirochaetae_D_2__Spirochaetes_D_3__Spirochaetales_D_4__Spirochaetaceae_D_5__Treponema_D_6__TreponemadenticolaH_22	3.22584	Periodontitis	2.90358	0.00638738
OTU_101_D_0__Bacteria_D_1__Bacteroidetes_D_2__Bacteroidia_D_3__Bacteroidales	3.27614	Periodontitis	2.90408	3.90964e-05
OTU_234_D_0__Bacteria_D_1__Bacteroidetes_D_2__Bacteroidia_D_3__Bacteroidales_D_4__Prevotellaceae_D_5__Prevotella_D_6__Prevotellasp_152R_1a	3.30044	Periodontitis	2.92959	0.000687523
OTU_108_D_0__Bacteria_D_1__Bacteroidetes_D_2__Bacteroidia_D_3__Bacteroidales_D_4__Prevotellaceae_D_5__Prevotella_D_6__unculturedbacterium	3.30631	Periodontitis	2.93583	0.00120605
OTU_95_D_0__Bacteria_D_1__Fusobacteria_D_2__Fusobacteriia_D_3__Fusobacteriales_D_4__Leptotrichiaceae_D_5__Leptotrichia	3.29509	Periodontitis	2.95211	0.000426241
OTU_846_D_0__Bacteria_D_1__Firmicutes_D_2__Clostridia_D_3__Clostridiales_D_4__Christensenellaceae_D_5__uncultured_D_6__Clostridialesbacteriumcanineoraltaxon038	3.30338	Periodontitis	2.95233	2.48592e-05
OTU_75_D_0__Bacteria_D_1__Firmicutes_D_2__Clostridia_D_3__Clostridiales_D_4__Ruminococcaceae_D_5__Ruminococcus	3.32791	Periodontitis	2.98107	0.00232996
OTU_109_D_0__Bacteria_D_1__Firmicutes_D_2__Clostridia_D_3__Clostridiales_D_4__FamilyXIII_D_5__IncertaeSedis_D_6__unculturedcompostbacterium	3.22794	Periodontitis	2.98774	3.46533e-05
OTU_221_D_0__Bacteria_D_1__Actinobacteria_D_2__Actinobacteria_D_3__Propionibacteriales_D_4__Propionibacteriaceae_D_5__Propionibacterium_D_6__PropionibacteriumacidifaciensF0233	3.25893	Periodontitis	2.9908	3.2481e-06
OTU_158_D_0__Bacteria_D_1__Firmicutes_D_2__Bacilli_D_3__Lactobacillales_D_4__Lactobacillaceae_D_5__Lactobacillus	3.21303	Periodontitis	2.9908	0.0119113
OTU_73_D_0__Bacteria_D_1__Firmicutes_D_2__Clostridia_D_3__Clostridiales_D_4__FamilyXIII	3.28049	Periodontitis	2.99136	0.000348613
OTU_186_D_0__Bacteria_D_1__Bacteroidetes_D_2__Bacteroidia_D_3__Bacteroidales_D_4__Prevotellaceae_D_5__Prevotella	3.34371	Periodontitis	2.9918	0.000271351
OTU_81_D_0__Bacteria_D_1__Synergistetes_D_2__Synergistia_D_3__Synergistales_D_4__Synergistaceae_D_5__Pyramidobacter_D_6__unculturedbacterium	3.35895	Periodontitis	3.00301	0.00048641
OTU_153_D_0__Bacteria_D_1__Firmicutes_D_2__Clostridia_D_3__Clostridiales_D_4__Eubacteriaceae_D_5__Pseudoramibacter_D_6__unculturedbacterium	3.34584	Periodontitis	3.00662	4.23527e-08
OTU_110_D_0__Bacteria_D_1__Actinobacteria_D_2__Actinobacteria_D_3__Bifidobacteriales_D_4__Bifidobacteriaceae_D_5__Parascardovia_D_6__ParascardoviadenticolensF0305	3.2464	Periodontitis	3.01246	8.43805e-06
OTU_83_D_0__Bacteria_D_1__Bacteroidetes_D_2__Bacteroidia_D_3__Bacteroidales_D_4__Porphyromonadaceae_D_5__Porphyromonas_D_6__Porphyromonassp_S886_12	3.34156	Periodontitis	3.01546	3.3699e-06
OTU_55_D_0__Bacteria_D_1__Firmicutes_D_2__Bacilli_D_3__Lactobacillales_D_4__Streptococcaceae_D_5__Streptococcus_D_6__Streptococcusdevriesei	3.48646	Periodontitis	3.03071	0.0188857
OTU_69_D_0__Bacteria_D_1__Firmicutes_D_2__Clostridia_D_3__Clostridiales_D_4__Lachnospiraceae_D_5__Acetitomaculum_D_6__Lachnospiraceaebacteriumcanineoraltaxon099	3.37814	Periodontitis	3.05598	0.00798483
OTU_68_D_0__Bacteria_D_1__Firmicutes_D_2__Clostridia_D_3__Clostridiales_D_4__FamilyXIII	3.46596	Periodontitis	3.08635	0.0232218
OTU_36_D_0__Bacteria_D_1__Firmicutes_D_2__Clostridia_D_3__Clostridiales_D_4__Ruminococcaceae_D_5__Fastidiosipila_D_6__Clostridialesbacteriumcanineoraltaxon336	3.59312	Periodontitis	3.09669	0.00486567
OTU_78_D_0__Bacteria_D_1__Firmicutes_D_2__Bacilli_D_3__Lactobacillales_D_4__Lactobacillaceae_D_5__Lactobacillus_D_6__unculturedmethanogenicarchaeon	3.34317	Periodontitis	3.09968	3.03058e-06
OTU_227_D_0__Bacteria_D_1__Bacteroidetes_D_2__Bacteroidia_D_3__Bacteroidales_D_4__Prevotellaceae	3.47987	Periodontitis	3.1007	0.000180724
OTU_102_D_0__Bacteria_D_1__Firmicutes_D_2__Clostridia_D_3__Clostridiales_D_4__Ruminococcaceae_D_5__Flavonifractor_D_6__unculturedbacterium	3.47038	Periodontitis	3.10116	0.00433571
OTU_157_D_0__Bacteria_D_1__Firmicutes_D_2__Negativicutes_D_3__Selenomonadales_D_4__Acidaminococcaceae_D_5__Acidaminococcus_D_6__unculturedbacterium	3.46272	Periodontitis	3.10696	2.33756e-06
OTU_59_D_0__Bacteria_D_1__Firmicutes_D_2__Negativicutes_D_3__Selenomonadales_D_4__Veillonellaceae_D_5__Dialister	3.44062	Periodontitis	3.10855	0.00036094
OTU_117_D_0__Bacteria_D_1__Bacteroidetes_D_2__Bacteroidia_D_3__Bacteroidales_D_4__Prevotellaceae_D_5__Prevotella_D_6__unculturedbacterium	3.4453	Periodontitis	3.11556	0.00928229
OTU_60_D_0__Bacteria_D_1__Firmicutes_D_2__Clostridia_D_3__Clostridiales_D_4__Ruminococcaceae_D_5__Ruminococcus_D_6__Ruminococcusflavefaciens	3.3651	Periodontitis	3.12148	0.000816245
OTU_56_D_0__Bacteria_D_1__Firmicutes_D_2__Clostridia_D_3__Clostridiales_D_4__Lachnospiraceae_D_5__Oribacterium	3.43675	Periodontitis	3.12215	1.00939e-06
OTU_76_D_0__Bacteria_D_1__Bacteroidetes_D_2__Bacteroidia_D_3__Bacteroidales_D_4__Porphyromonadaceae_D_5__Porphyromonas_D_6__unculturedbacterium	3.40357	Periodontitis	3.12658	0.000106286
OTU_45_D_0__Bacteria_D_1__Bacteroidetes_D_2__Bacteroidia_D_3__Bacteroidales_D_4__S24_7	3.51658	Periodontitis	3.1289	8.36699e-05
OTU_85_D_0__Bacteria_D_1__Bacteroidetes_D_2__Bacteroidia_D_3__Bacteroidales_D_4__BS11gutgroup_D_5__Bacteroidetes_D_6__Bacteroidetes	3.47317	Periodontitis	3.13021	7.09541e-05
OTU_128_D_0__Bacteria_D_1__Bacteroidetes_D_2__Bacteroidia_D_3__Bacteroidales_D_4__Prevotellaceae_D_5__Prevotella_D_6__unidentifiedrumenbacterium12_7	3.51079	Periodontitis	3.1635	0.000159756
OTU_65_D_0__Bacteria_D_1__Firmicutes_D_2__Clostridia_D_3__Clostridiales_D_4__FamilyXIII_D_5__IncertaeSedis_D_6__unculturedbacterium	3.51442	Periodontitis	3.16923	2.43576e-05
OTU_72_D_0__Bacteria_D_1__Bacteroidetes_D_2__Bacteroidia_D_3__Bacteroidales_D_4__Prevotellaceae_D_5__Prevotella_D_6__unculturedbacterium	3.48953	Periodontitis	3.17158	3.51131e-05
OTU_104_D_0__Bacteria_D_1__Firmicutes_D_2__Bacilli_D_3__Lactobacillales_D_4__Streptococcaceae_D_5__Streptococcus	3.49447	Periodontitis	3.17684	0.00289351
OTU_77_D_0__Bacteria_D_1__Bacteroidetes_D_2__Bacteroidia_D_3__Bacteroidales_D_4__Rikenellaceae_D_5__RC9gutgroup	3.5988	Periodontitis	3.21671	3.73591e-05
OTU_61_D_0__Bacteria_D_1__Firmicutes_D_2__Negativicutes_D_3__Selenomonadales_D_4__Veillonellaceae_D_5__Veillonella	3.54508	Periodontitis	3.25255	0.00186165
OTU_43_D_0__Bacteria_D_1__Firmicutes_D_2__Clostridia_D_3__Clostridiales_D_4__Ruminococcaceae_D_5__Fastidiosipila	3.68384	Periodontitis	3.32095	2.94199e-05
OTU_88_D_0__Bacteria_D_1__Actinobacteria_D_2__Coriobacteriia_D_3__Coriobacteriales_D_4__Coriobacteriaceae	3.68482	Periodontitis	3.36283	2.5847e-08
OTU_115_D_0__Bacteria_D_1__Firmicutes_D_2__Negativicutes_D_3__Selenomonadales_D_4__Veillonellaceae_D_5__Dialister_D_6__unculturedbacterium	3.69111	Periodontitis	3.36616	1.1599e-05
OTU_58_D_0__Bacteria_D_1__Firmicutes_D_2__Negativicutes_D_3__Selenomonadales_D_4__Veillonellaceae_D_5__Veillonella_D_6__unculturedmethanogenicarchaeon	3.71107	Periodontitis	3.37817	1.15111e-07
OTU_49_D_0__Bacteria_D_1__Fusobacteria_D_2__Fusobacteriia_D_3__Fusobacteriales_D_4__Leptotrichiaceae_D_5__Leptotrichia_D_6__Leptotrichiasp_OralTaxon847	3.71881	Periodontitis	3.38419	3.86616e-06
OTU_103_D_0__Bacteria_D_1__Bacteroidetes_D_2__Bacteroidia_D_3__Bacteroidales_D_4__Prevotellaceae_D_5__Prevotella	3.75782	Periodontitis	3.38567	0.000194153
OTU_40_D_0__Bacteria_D_1__Firmicutes_D_2__Clostridia_D_3__Clostridiales_D_4__Ruminococcaceae_D_5__Fastidiosipila	3.73929	Periodontitis	3.40249	0.0423791
OTU_30_D_0__Bacteria_D_1__Firmicutes_D_2__Clostridia_D_3__Clostridiales_D_4__FamilyXI_D_5__uncultured_D_6__Eubacteriumsp_oralcloneDA014	3.80651	Periodontitis	3.48443	3.56925e-05
OTU_24_D_0__Bacteria_D_1__Synergistetes_D_2__Synergistia_D_3__Synergistales_D_4__Synergistaceae_D_5__Pyramidobacter	3.8827	Periodontitis	3.51699	5.1399e-05
OTU_50_D_0__Bacteria_D_1__Firmicutes_D_2__Clostridia_D_3__Clostridiales_D_4__FamilyXI_D_5__Murdochiella_D_6__unculturedbacterium	3.93808	Periodontitis	3.56876	5.7676e-05
OTU_113_D_0__Bacteria_D_1__Bacteroidetes_D_2__Bacteroidia_D_3__Bacteroidales_D_4__Prevotellaceae_D_5__Prevotella	3.93808	Periodontitis	3.57965	0.000179863
OTU_53_D_0__Bacteria_D_1__Bacteroidetes_D_2__Bacteroidia_D_3__Bacteroidales_D_4__Prevotellaceae_D_5__Prevotella	3.87788	Periodontitis	3.61623	0.00956764
OTU_42_D_0__Bacteria_D_1__Firmicutes_D_2__Negativicutes_D_3__Selenomonadales_D_4__Acidaminococcaceae_D_5__Succiniclasticum_D_6__unculturedbacterium	4.07701	Periodontitis	3.66844	9.00469e-06
OTU_33_D_0__Bacteria_D_1__Bacteroidetes_D_2__Bacteroidia_D_3__Bacteroidales_D_4__Prevotellaceae_D_5__Prevotella	4.08698	Periodontitis	3.70604	3.09192e-05
OTU_23_D_0__Bacteria_D_1__Firmicutes_D_2__Negativicutes_D_3__Selenomonadales_D_4__Acidaminococcaceae_D_5__Succiniclasticum	4.05522	Periodontitis	3.74285	0.000282323
OTU_29_D_0__Bacteria_D_1__Actinobacteria_D_2__Actinobacteria_D_3__Actinomycetales_D_4__Actinomycetaceae_D_5__Actinomyces_D_6__unculturedbacterium	4.07573	Periodontitis	3.74353	0.008524
OTU_64_D_0__Bacteria_D_1__Bacteroidetes_D_2__Bacteroidia_D_3__Bacteroidales_D_4__Prevotellaceae_D_5__Prevotella	4.043	Periodontitis	3.76027	1.4831e-05
OTU_35_D_0__Bacteria_D_1__Fusobacteria_D_2__Fusobacteriia_D_3__Fusobacteriales_D_4__Fusobacteriaceae_D_5__Fusobacterium_D_6__unculturedbacterium	4.19079	Periodontitis	3.78271	8.1123e-06
OTU_31_D_0__Bacteria_D_1__Bacteroidetes_D_2__Bacteroidia_D_3__Bacteroidales_D_4__Prevotellaceae_D_5__Prevotella_D_6__unculturedbacterium	4.15323	Periodontitis	3.80068	3.28753e-05
OTU_37_D_0__Bacteria_D_1__Bacteroidetes_D_2__Bacteroidia_D_3__Bacteroidales_D_4__Prevotellaceae_D_5__Prevotella_D_6__unculturedbacterium	4.11294	Periodontitis	3.80079	1.30302e-05
OTU_16_D_0__Bacteria_D_1__Firmicutes_D_2__Clostridia_D_3__Clostridiales_D_4__Lachnospiraceae	4.17238	Periodontitis	3.83629	6.07409e-07
OTU_34_D_0__Bacteria_D_1__Fusobacteria_D_2__Fusobacteriia_D_3__Fusobacteriales	4.23494	Periodontitis	3.90059	3.69609e-05
OTU_27_D_0__Bacteria_D_1__Bacteroidetes_D_2__Bacteroidia_D_3__Bacteroidales_D_4__Prevotellaceae_D_5__Prevotella_D_6__unculturedbacterium	4.27863	Periodontitis	3.92042	0.000380855
OTU_28_D_0__Bacteria_D_1__Bacteroidetes_D_2__Bacteroidia_D_3__Bacteroidales_D_4__Prevotellaceae_D_5__Prevotella_D_6__Prevotelladentasini	4.34887	Periodontitis	4.00899	0.000413949
OTU_7_D_0__Bacteria_D_1__Firmicutes_D_2__Bacilli_D_3__Lactobacillales_D_4__Streptococcaceae_D_5__Streptococcus_D_6__StreptococcuscricetiHS_6	4.50995	Periodontitis	4.21245	0.000930325
OTU_8_D_0__Bacteria_D_1__Firmicutes_D_2__Negativicutes_D_3__Selenomonadales_D_4__Veillonellaceae_D_5__Veillonella_D_6__unculturedbacterium	4.61502	Periodontitis	4.27073	2.96537e-05
